# Supplementary material
Source: Springer Nature journal article supplement (https://www.springermedizin.de/resource/supplementary/12985_2010_1028_MOESM1_ESM.pdf/9608982)

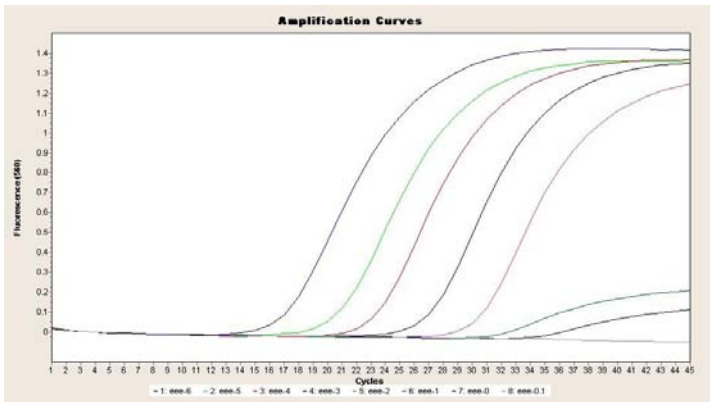

A

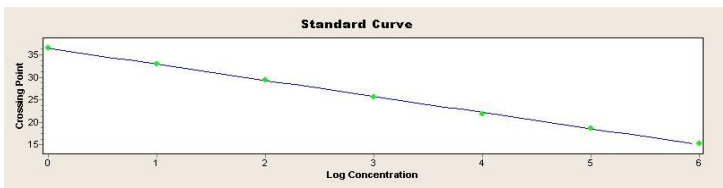

B

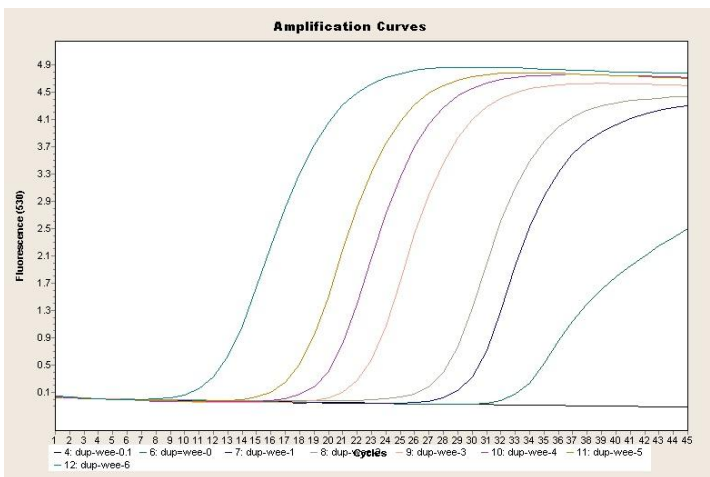

C

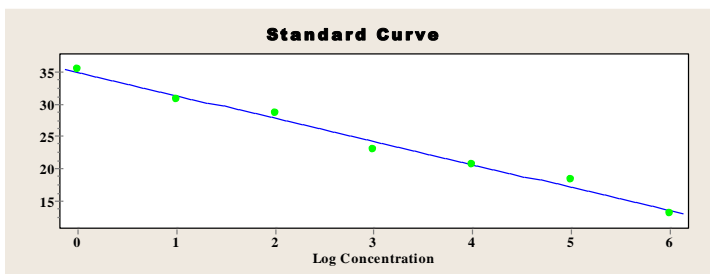

D

Supplement: MOESM1 [file 9608982]
